# Supplementary material
Source: publisher figshare collection journal article supplement (https://geolsoc.figshare.com/ndownloader/files/29147011)
Supplement: Supplementary file 1 [file 29147011]

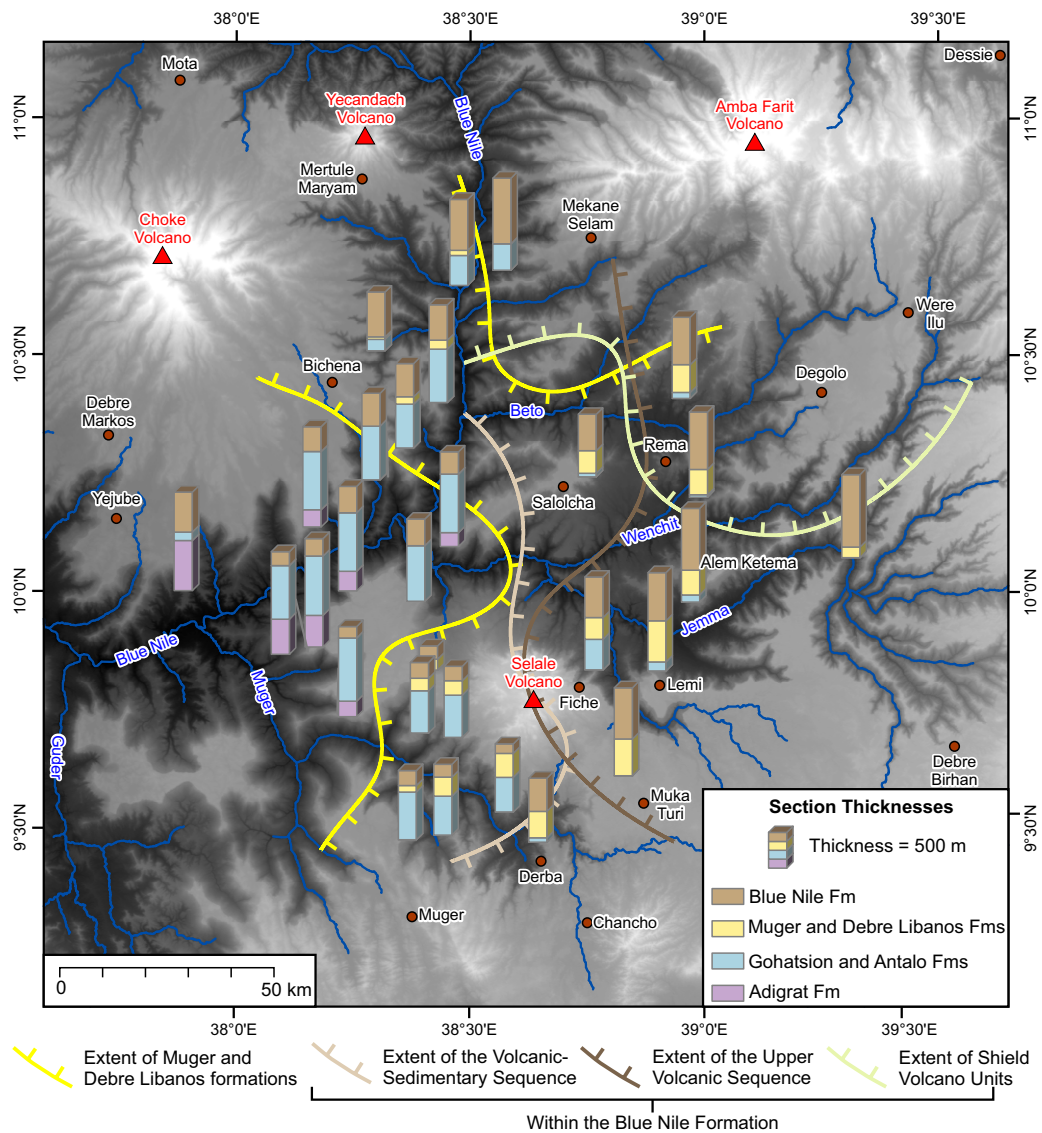

Preliminary map of thickness variations within the Blue Nile Basin. The columns represent composite sections with the base of the Aiba Formation serving as the reference level. The unit at the base of the columns should be regarded as a minimum thickness. Preliminary extents of certain units are shown based simply on the presence or absence of that unit in the columns.
